# Supplementary material
Source: PubMed Central journal article supplement (PMC1345677)
Supplement: mbc_E05-07-0594_1.pdf [file mbc_E05-07-0594_1.pdf]

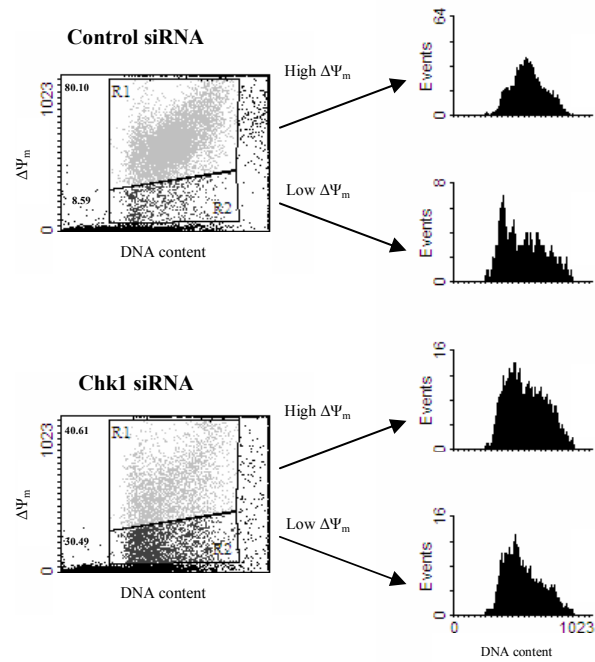

**Supplementary figure 1. Thymidine treatment of Chk1 depleted cells predominantly induces loss of mitochondrial membrane potential in cells in early S-phase.** Effect of siRNA transfection, on cell cycle distribution of HCT 116 cells with high or low ( $\Delta\Psi_m$ ) following treatment with 2 mM thymidine for 48 hours. Live cells (with high  $\Delta\Psi_m$ ) and dying cells (with low  $\Delta\Psi_m$ ) are gated and computed (R1 and R2 gates respectively) in the cytogram panels on the left and their corresponding cell cycle profiles are depicted in the panels on the right. Cells presenting very low  $\Delta\Psi_m$  (below R2) were not computed as dying cells.
